# Supplementary material
Source: publisher site journal article supplement (https://www.dovepress.com/article/409680)
Supplement: Supplementary file 1 [file get_supplementary_file.php]

| Project: Chinese EFL Teachers’ Cognition and Practices of Educational Equity in EFL Teaching  **Teacher:**  **Class Level:**   **Date: Time:** **Place:** |
| --- |
| **Introduction:** *During the interview, I will ask you to explain the particular practices previously observed in your reading instruction. First, I will replay several episodes of your lessons for you to recall your memory. After that, I will invite you to answer a series of questions concerning your instructional behaviors at that moment. Further related questions are also included. Should you agree, I will audio-record the interview for later analysis. The interview will last about one hour. Thank you for your cooperation and support.* |
| **Step 1: The researcher first replayed the episodes for the interviewer before interviewing.**  **Step 2: Questions about episodes**  Episode 1:  Question:  Episode 2:  Question:  Episode 3:  Question:  Episode 4:  Question:  Episode 5:  Question:  Episode 5:  Question:  …  **Step 3: Further questions**  1• To integrate equity in your English teaching, what do you think the challenges are?  Prompt: Why?  2• What factors do you think may improve equity in classroom teaching?  Prompt: Why? How?  3• What factors do you think may undermine equity in classroom teaching?  Prompt: Why? How? |

**APPENDIX 1:** **Interview Protocol for Stimulated Recall Interview**
